# Supplementary material for: Interneuron FGF13 regulates seizure susceptibility via a sodium channel-independent mechanism
Source: eLife journal article supplement (doi:10.7554/elife.98661), 2024-06-21
Supplement: fig1-data1 [file elife-98661-fig1-data1-v1.zip]

Figure 1B-Source Data

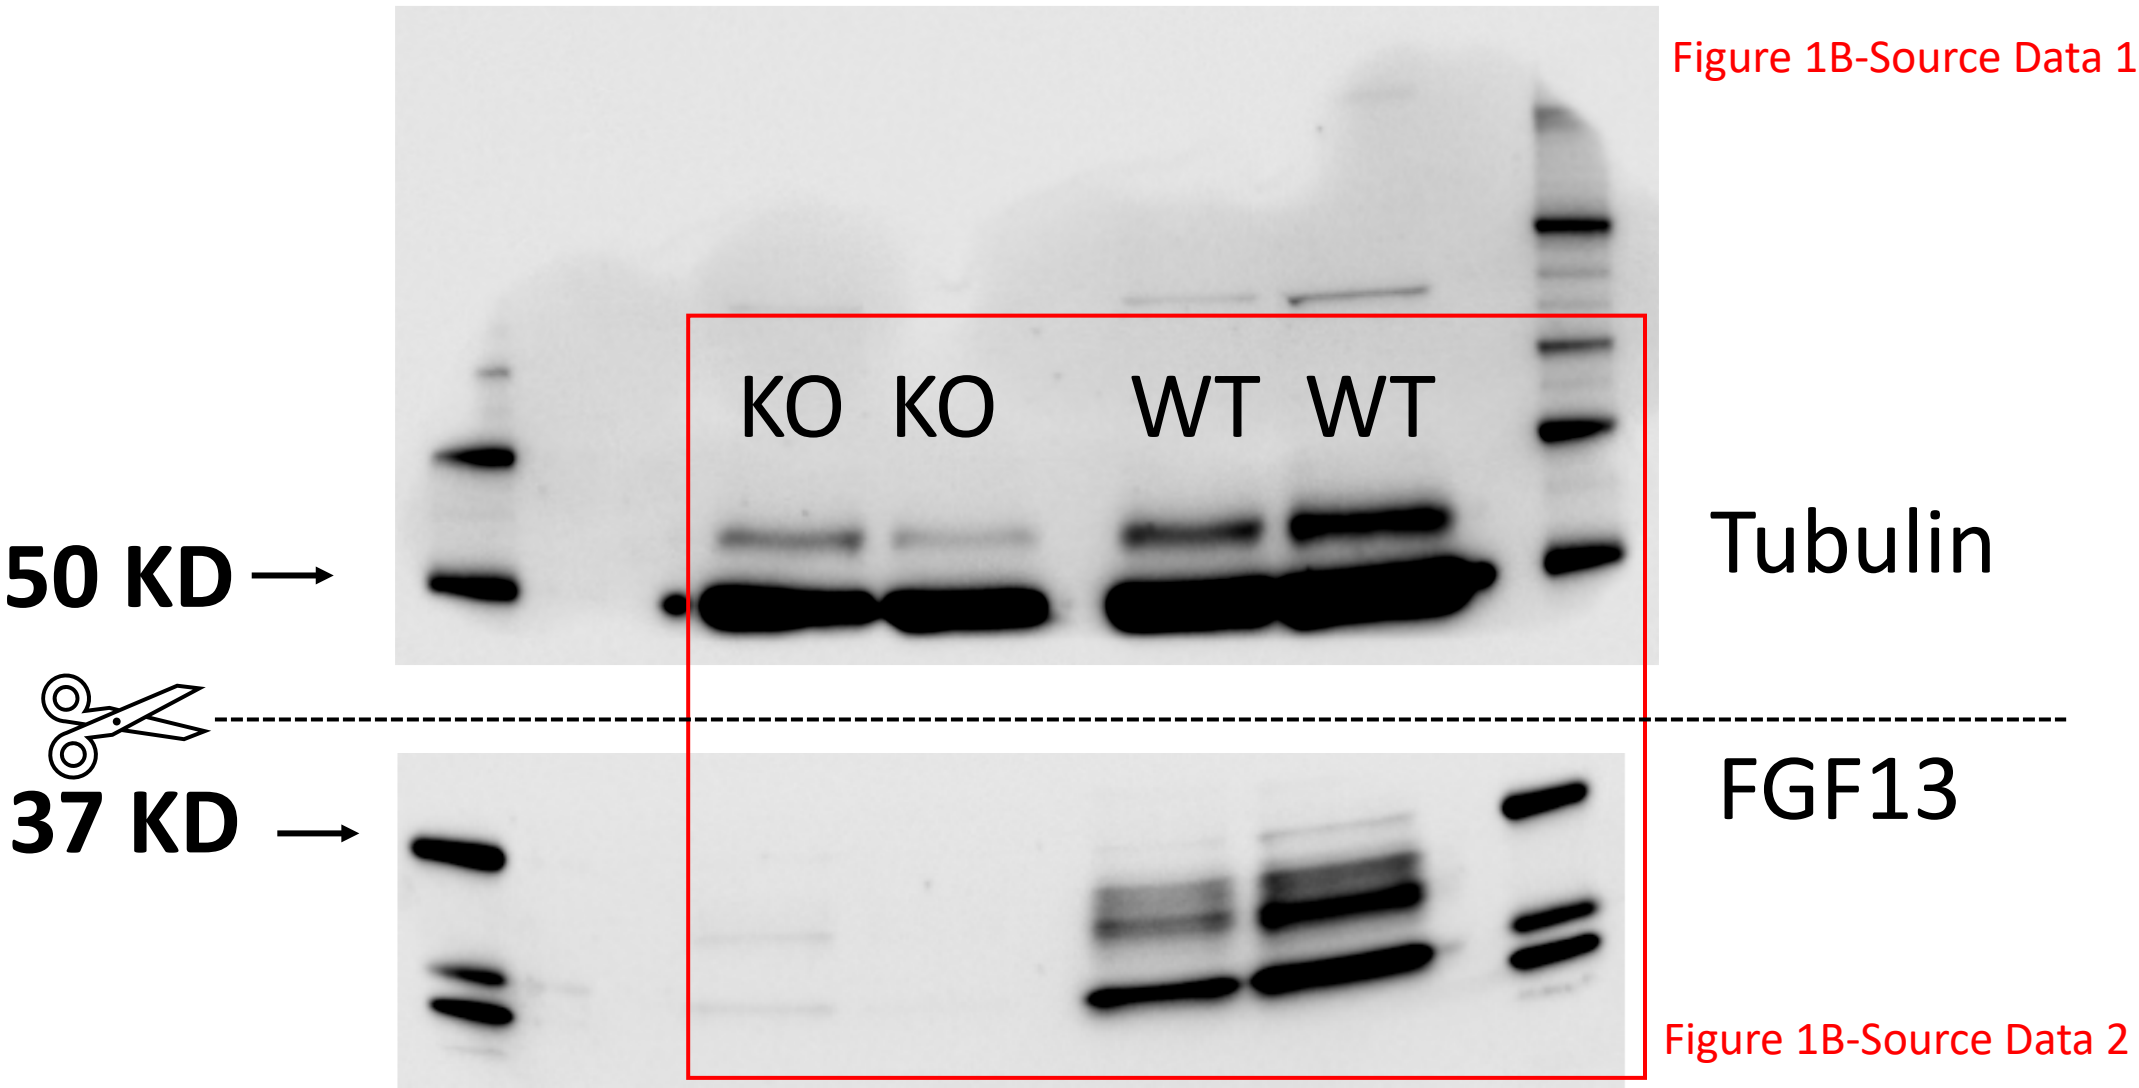

Gel cut where indicated, probed separately for tubulin (top) and FGF13 (bottom).  
Image flipped horizontally
