# Supplementary material for: Interneuron FGF13 regulates seizure susceptibility via a sodium channel-independent mechanism
Source: eLife journal article supplement (doi:10.7554/elife.98661), 2024-06-21
Supplement: fig1-figsupp1-data1 [file elife-98661-fig1-figsupp1-data1-v1.zip]

Figure 1-figure supplement 1B-Source Data 1

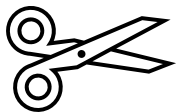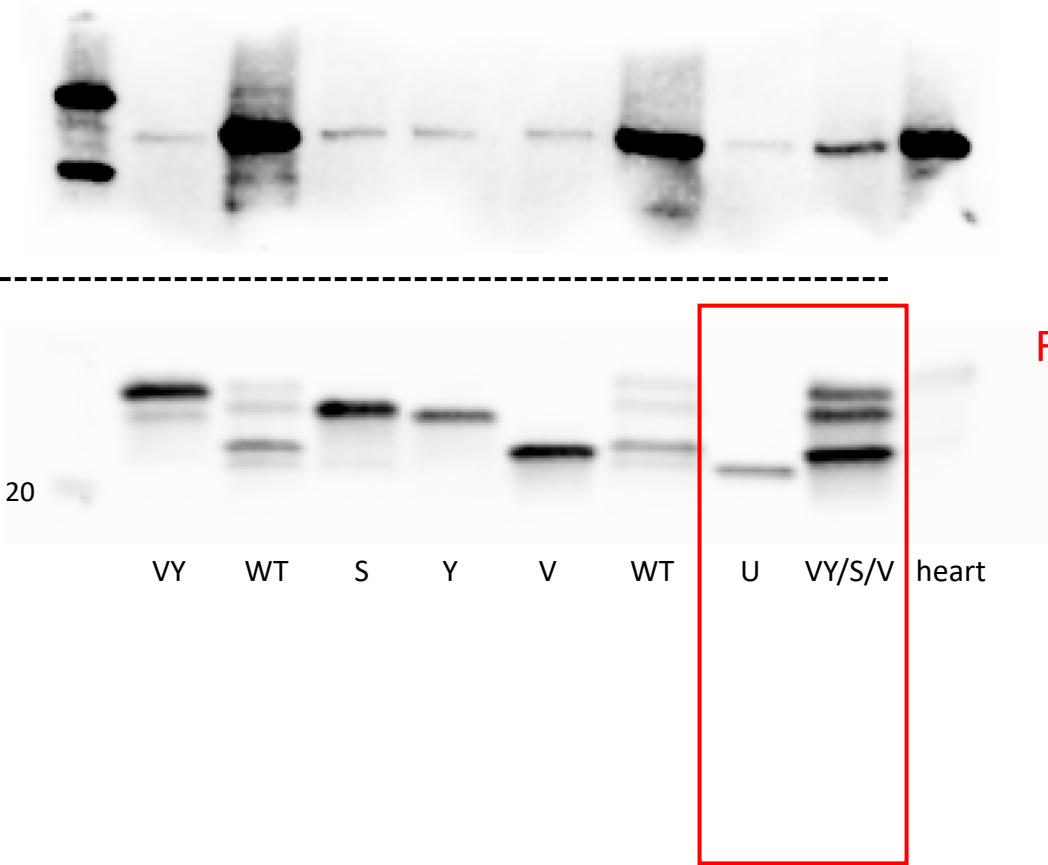

Figure 1-figure supplement 1B-source data 1

4-15% Biorad gel

Gel cut where indicated, probed separately for tubulin (top) and FGF13 (bottom).  
Image flipped horizontally for final figure

Figure 1-figure supplement 1B-Source data 2 and source data 3

Figure 1-figure supplement 1B-source data 2

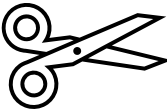

Figure 1-figure supplement 1B-source data 3

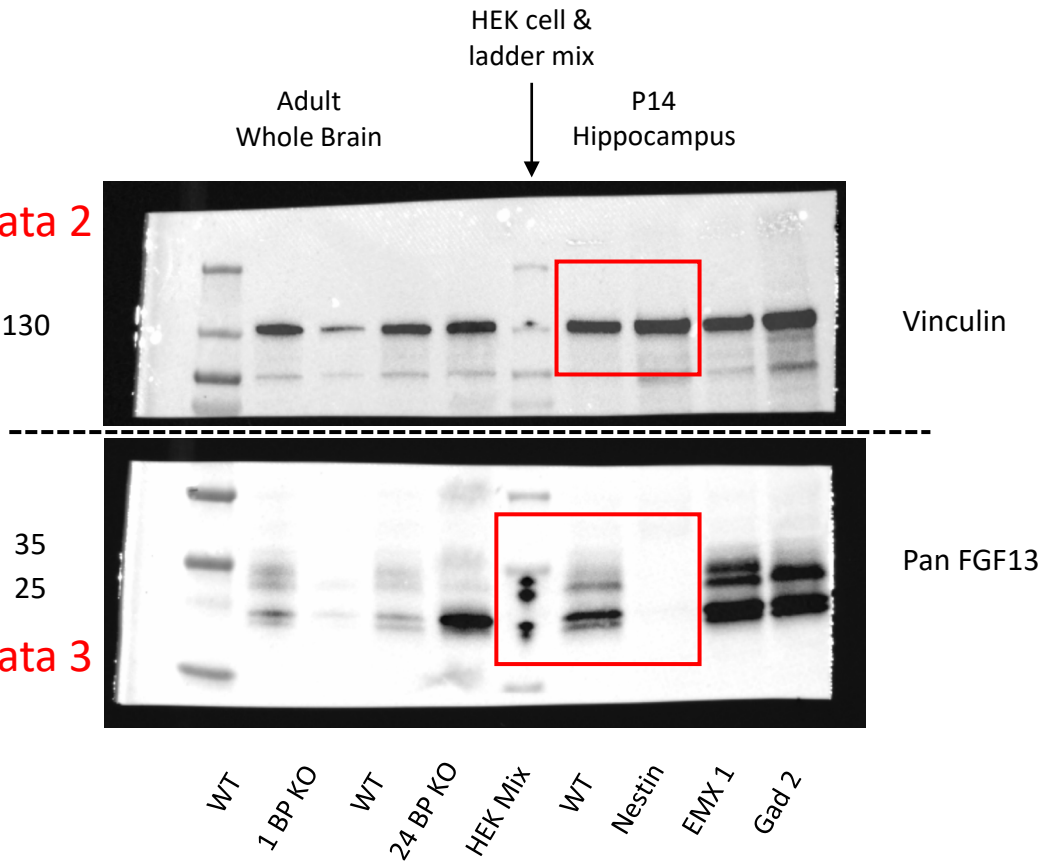

Gel cut where indicated, probed separately for vinculin (top) and FGF13 (bottom). Images flipped horizontally for final figure. For bottom image, only the chemiluminescent signal (not the colorimetric signal-for Mw markers) is shown in the final figure
