# Supplementary material for: Interneuron FGF13 regulates seizure susceptibility via a sodium channel-independent mechanism
Source: eLife journal article supplement (doi:10.7554/elife.98661), 2024-06-21
Supplement: fig2-data1 [file elife-98661-fig2-data1-v1.zip]

Figure 2A-Source data

Imaged 5-19-2022  
4-15% BioRad Tris-Glycine gel  
200V for 40 min

Figure 2A-Source Data 1

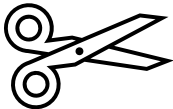

Figure 2A-Source Data 2

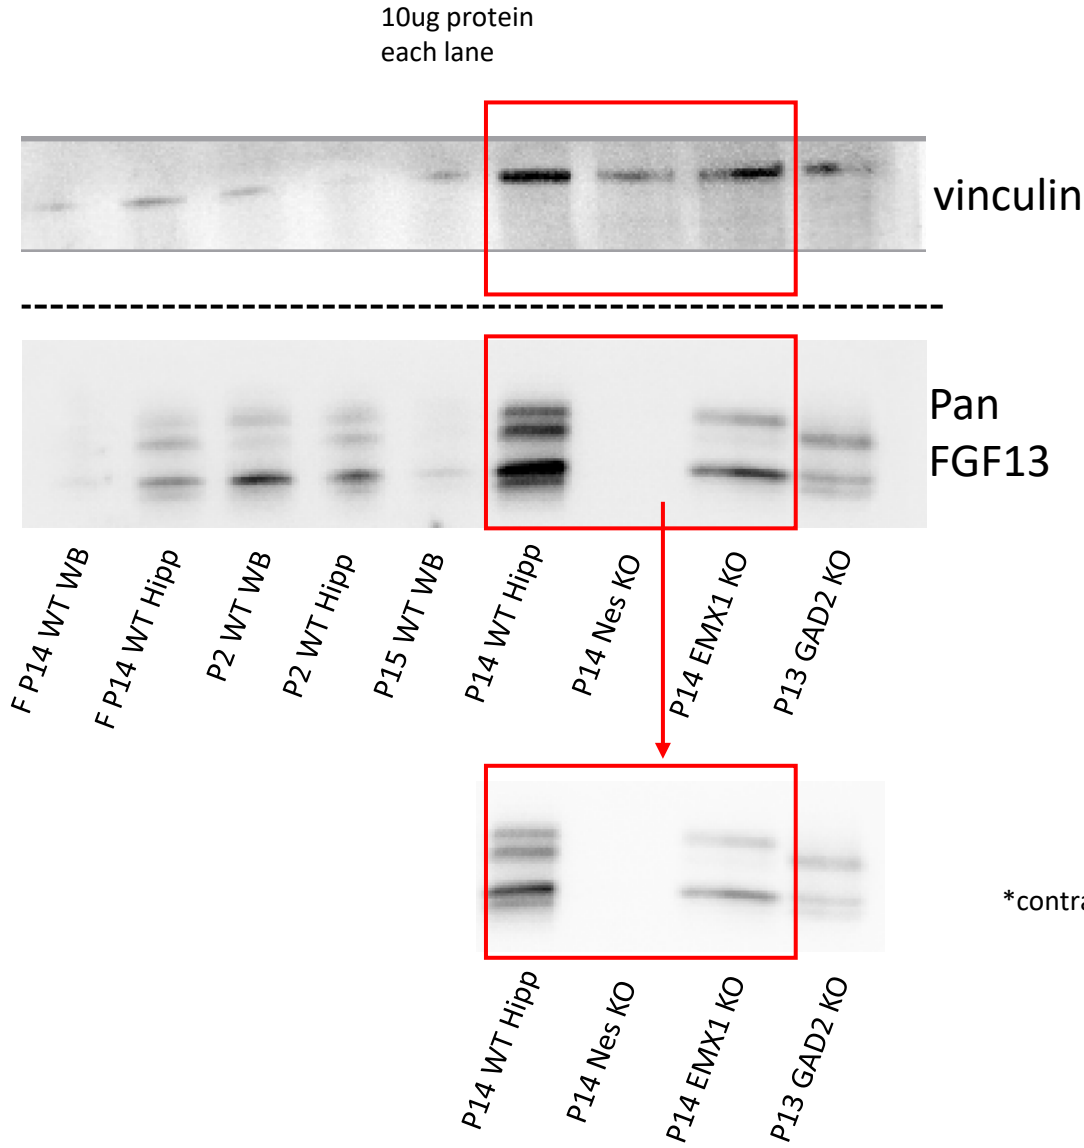

\*contrast adjusted

Gel cut where indicated, probed separately for vinculin (top) and FGF13 (bottom). Image contrast for FGF13 adjusted
