# Supplementary material for: Interneuron FGF13 regulates seizure susceptibility via a sodium channel-independent mechanism
Source: eLife journal article supplement (doi:10.7554/elife.98661), 2024-06-21
Supplement: fig2-figsupp1-data1 [file elife-98661-fig2-figsupp1-data1-v1.zip]

**Figure 2-figure supplement 1 -Source data 1**  
*Shows colorimetric and chemiluminescent signal*

Figure 2-figure supplement 1-source data 1

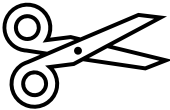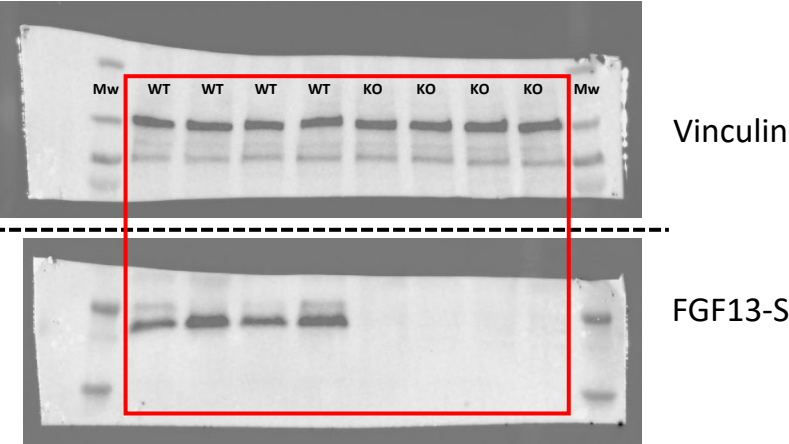

Figure 2-figure supplement 1-source data 2

Gel cut where indicated, probed separately for vinculin (top) and FGF13 (bottom).

**Figure 2-figure supplement 1 -Source data 1**  
*Shows ONLY chemiluminescent signal*

Figure 2-figure supplement 1-source data 1

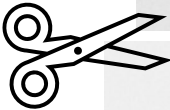

Figure 2-figure supplement 1-source data 2

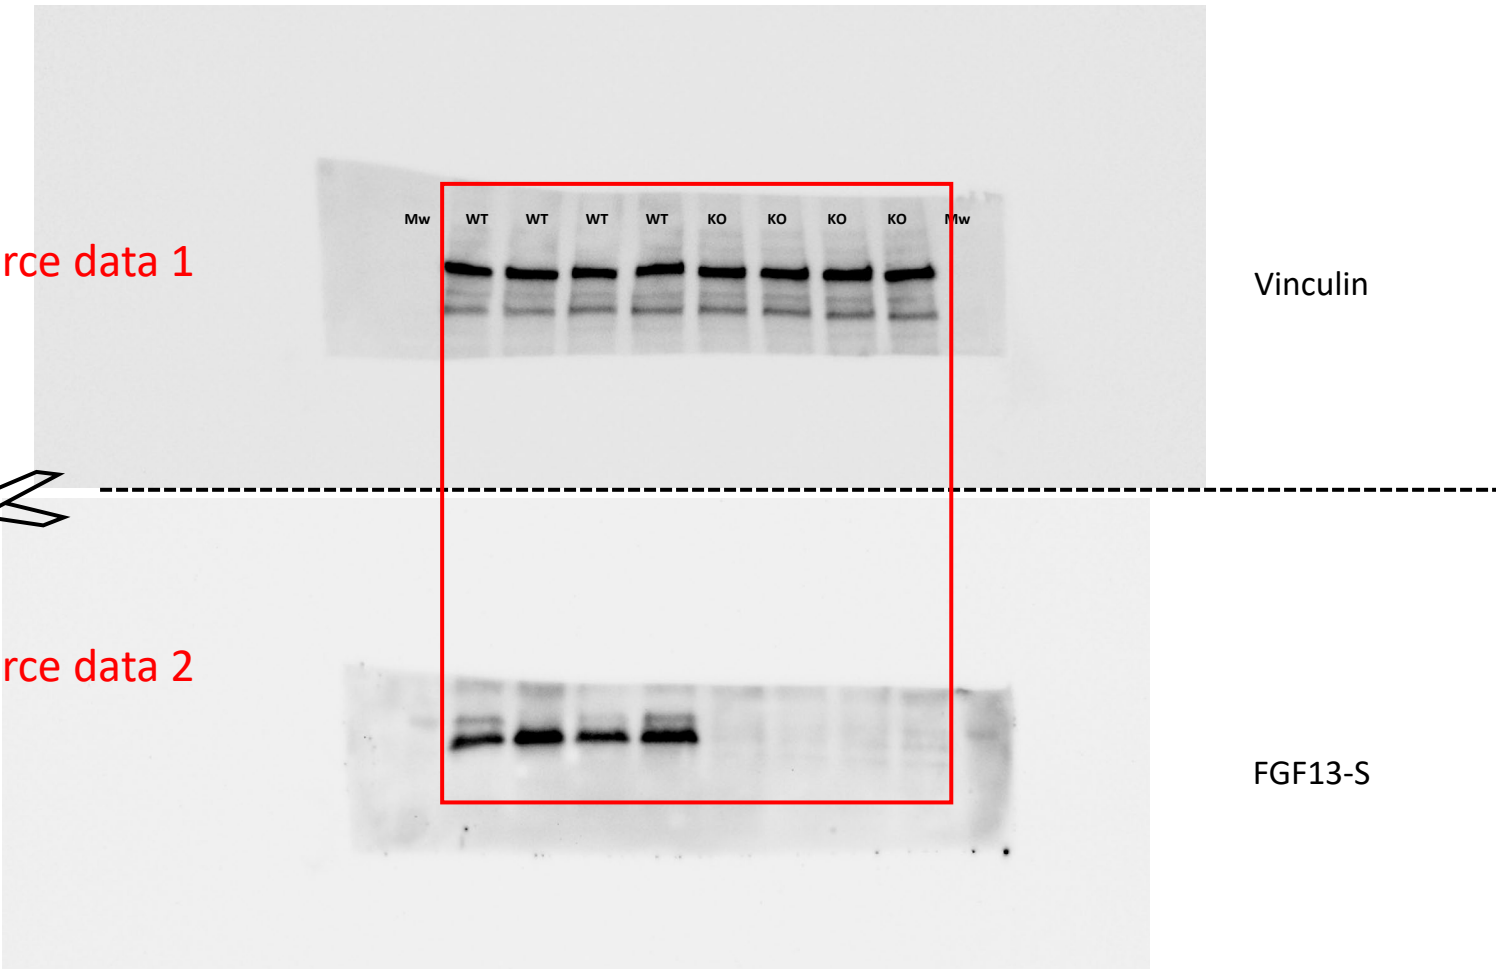

Gel cut where indicated, probed separately for vinculin (top) and FGF13 (bottom).
